# Supplementary material for: Chemical formula input relied intelligent identification of an inorganic perovskite for solar thermochemical hydrogen production
Source: Royal Society of Chemistry journal article supplement (doi:10.1039/d0qi01521k), 2021-01-01
Supplement: d0qi01521k1.xlsx [file d0qi01521k1.xlsx]

## Sheet: 443 ABO3
Chemical formula	A	B	Lv (A)	Nv (A)	AR (A)	Lv (B)	Nv (B)	AR (B)	Vacancy energy [eV/O atom]	Feasibility of STC hydrogen
AlScO3	Al	Sc	1	3	1.18	2	3	1.44	-4.725	0
AsScO3	As	Sc	1	5	1.2	2	3	1.44	-2.666	0
AuScO3	Au	Sc	0	1	1.34	2	3	1.44	-3.267	0
BScO3	B	Sc	1	3	0.82	2	3	1.44	-5.495	0
BaScO3	Ba	Sc	0	2	1.98	2	3	1.44	0.463	0
BeScO3	Be	Sc	0	2	0.89	2	3	1.44	-4.176	0
CoScO3	Co	Sc	2	9	1.16	2	3	1.44	-2.898	0
CrScO3	Cr	Sc	2	6	1.18	2	3	1.44	-3.18	0
CuScO3	Cu	Sc	0	1	1.17	2	3	1.44	-3.057	0
ErScO3	Er	Sc	3	14	1.58	2	3	1.44	4.961	1
GaScO3	Ga	Sc	1	3	1.26	2	3	1.44	-4.511	0
GeScO3	Ge	Sc	1	4	1.22	2	3	1.44	-1.646	0
HfScO3	Hf	Sc	2	4	1.44	2	3	1.44	-2.521	0
HoScO3	Ho	Sc	3	13	1.58	2	3	1.44	5.011	0
IrScO3	Ir	Sc	2	9	0.68	2	3	1.44	-5.969	0
KScO3	K	Sc	0	1	2.03	2	3	1.44	-0.848	0
LiScO3	Li	Sc	0	1	1.23	2	3	1.44	-1.701	0
LuScO3	Lu	Sc	2	3	1.56	2	3	1.44	4.801	1
MgScO3	Mg	Sc	0	2	1.36	2	3	1.44	-2.243	0
MnScO3	Mn	Sc	2	7	1.17	2	3	1.44	-1.879	0
MoScO3	Mo	Sc	2	6	1.3	2	3	1.44	-3.025	0
NbScO3	Nb	Sc	2	5	1.34	2	3	1.44	-2.429	0
OsScO3	Os	Sc	2	8	1.26	2	3	1.44	-5.885	0
PaScO3	Pa	Sc	3	5	0.95	2	3	1.44	4.351	1
PdScO3	Pd	Sc	0	0	1.28	2	3	1.44	-3.967	0
PtScO3	Pt	Sc	2	10	1.3	2	3	1.44	-4.4	0
RbScO3	Rb	Sc	0	1	2.16	2	3	1.44	-0.889	0
ReScO3	Re	Sc	2	7	1.28	2	3	1.44	-5.351	0
RuScO3	Ru	Sc	2	8	1.25	2	3	1.44	-3.854	0
SbScO3	Sb	Sc	1	5	1.4	2	3	1.44	0.35	0
Sc2O3	Sc	Sc	2	3	1.44	2	3	1.44	1.199	0
SiScO3	Si	Sc	1	4	1.11	2	3	1.44	-4.334	0
SnScO3	Sn	Sc	1	4	1.4	2	3	1.44	-0.585	0
TaScO3	Ta	Sc	2	5	1.34	2	3	1.44	-5.103	0
TcScO3	Tc	Sc	2	7	1.27	2	3	1.44	-3.031	0
TeScO3	Te	Sc	1	6	1.36	2	3	1.44	-2.076	0
TiScO3	Ti	Sc	2	4	1.32	2	3	1.44	-1.921	0
TmScO3	Tm	Sc	3	15	1.58	2	3	1.44	4.911	1
VScO3	V	Sc	2	5	1.22	2	3	1.44	-3.636	0
WScO3	W	Sc	2	6	1.3	2	3	1.44	-5.206	0
ZnScO3	Zn	Sc	0	2	1.25	2	3	1.44	-2.964	0
ZrScO3	Zr	Sc	2	4	1.45	2	3	1.44	-0.591	0
AlTiO3	Al	Ti	1	3	1.18	2	4	1.32	0.011	0
AsTiO3	As	Ti	1	5	1.2	2	4	1.32	0.658	0
BTiO3	B	Ti	1	3	0.82	2	4	1.32	-1.49	0
BeTiO3	Be	Ti	0	2	0.89	2	4	1.32	0.033	0
CoTiO3	Co	Ti	2	9	1.16	2	4	1.32	1.218	0
FeTiO3	Fe	Ti	2	8	1.17	2	4	1.32	1.521	0
GaTiO3	Ga	Ti	1	3	1.26	2	4	1.32	1.174	0
HfTiO3	Hf	Ti	2	4	1.44	2	4	1.32	2.226	0
IrTiO3	Ir	Ti	2	9	0.68	2	4	1.32	-1.56	0
MoTiO3	Mo	Ti	2	6	1.3	2	4	1.32	1.916	0
NaTiO3	Na	Ti	0	1	1.54	2	4	1.32	-0.301	0
NbTiO3	Nb	Ti	2	5	1.34	2	4	1.32	1.931	0
OsTiO3	Os	Ti	2	8	1.26	2	4	1.32	-2.52	0
PdTiO3	Pd	Ti	0	0	1.28	2	4	1.32	0.139	0
PtTiO3	Pt	Ti	2	10	1.3	2	4	1.32	-0.195	0
ReTiO3	Re	Ti	2	7	1.28	2	4	1.32	-2.031	0
RhTiO3	Rh	Ti	2	9	1.25	2	4	1.32	0.396	0
RuTiO3	Ru	Ti	2	8	1.25	2	4	1.32	0.353	0
ScTiO3	Sc	Ti	2	3	1.44	2	4	1.32	3.687	1
SiTiO3	Si	Ti	1	4	1.11	2	4	1.32	1.685	0
TaTiO3	Ta	Ti	2	5	1.34	2	4	1.32	-3.211	0
TcTiO3	Tc	Ti	2	7	1.27	2	4	1.32	1.36	0
TeTiO3	Te	Ti	1	6	1.36	2	4	1.32	2.349	0
Ti2O3	Ti	Ti	2	4	1.32	2	4	1.32	2.661	1
VTiO3	V	Ti	2	5	1.22	2	4	1.32	1.646	0
WTiO3	W	Ti	2	6	1.3	2	4	1.32	-3.038	0
ZnTiO3	Zn	Ti	0	2	1.25	2	4	1.32	1.342	0
ZrTiO3	Zr	Ti	2	4	1.45	2	4	1.32	2.821	1
AsVO3	As	V	1	5	1.2	2	5	1.22	-0.112	0
BVO3	B	V	1	3	0.82	2	5	1.22	0.246	0
BeVO3	Be	V	0	2	0.89	2	5	1.22	0.146	0
CoVO3	Co	V	2	9	1.16	2	5	1.22	1.271	0
CrVO3	Cr	V	2	6	1.18	2	5	1.22	1.672	0
CsVO3	Cs	V	0	1	2.35	2	5	1.22	0.368	0
GaVO3	Ga	V	1	3	1.26	2	5	1.22	1.138	0
HfVO3	Hf	V	2	4	1.44	2	5	1.22	1.959	0
IrVO3	Ir	V	2	9	0.68	2	5	1.22	-2.37	0
LuVO3	Lu	V	2	3	1.56	2	5	1.22	3.721	1
MgVO3	Mg	V	0	2	1.36	2	5	1.22	2.49	0
MoVO3	Mo	V	2	6	1.3	2	5	1.22	0.96	0
NbVO3	Nb	V	2	5	1.34	2	5	1.22	1.403	0
OsVO3	Os	V	2	8	1.26	2	5	1.22	-3.713	0
PaVO3	Pa	V	3	5	0.95	2	5	1.22	2.604	1
PdVO3	Pd	V	0	0	1.28	2	5	1.22	1.653	0
PtVO3	Pt	V	2	10	1.3	2	5	1.22	-0.296	0
ReVO3	Re	V	2	7	1.28	2	5	1.22	-3.179	0
RhVO3	Rh	V	2	9	1.25	2	5	1.22	0.276	0
RuVO3	Ru	V	2	8	1.25	2	5	1.22	-0.697	0
ScVO3	Sc	V	2	3	1.44	2	5	1.22	2.974	1
SiVO3	Si	V	1	4	1.11	2	5	1.22	0.215	0
TaVO3	Ta	V	2	5	1.34	2	5	1.22	1.145	0
TcVO3	Tc	V	2	7	1.27	2	5	1.22	0.505	0
TeVO3	Te	V	1	6	1.36	2	5	1.22	1.88	0
TiVO3	Ti	V	2	4	1.32	2	5	1.22	2.541	1
V2O3	V	V	2	5	1.22	2	5	1.22	0.598	0
WVO3	W	V	2	6	1.3	2	5	1.22	-3.895	0
ZnVO3	Zn	V	0	2	1.25	2	5	1.22	1.518	0
ZrVO3	Zr	V	2	4	1.45	2	5	1.22	2.395	0
AlCrO3	Al	Cr	1	3	1.18	2	6	1.18	-1.25	0
AsCrO3	As	Cr	1	5	1.2	2	6	1.18	0.789	0
AuCrO3	Au	Cr	0	1	1.34	2	6	1.18	-0.144	0
BCrO3	B	Cr	1	3	0.82	2	6	1.18	-1.803	0
BeCrO3	Be	Cr	0	2	0.89	2	6	1.18	-1.02	0
Cr2O3	Cr	Cr	2	6	1.18	2	6	1.18	-0.172	0
CuCrO3	Cu	Cr	0	1	1.17	2	6	1.18	-0.457	0
FeCrO3	Fe	Cr	2	8	1.17	2	6	1.18	-2.381	0
GaCrO3	Ga	Cr	1	3	1.26	2	6	1.18	-1.107	0
GeCrO3	Ge	Cr	1	4	1.22	2	6	1.18	1.067	0
HfCrO3	Hf	Cr	2	4	1.44	2	6	1.18	2.003	0
InCrO3	In	Cr	1	3	1.44	2	6	1.18	0.425	0
IrCrO3	Ir	Cr	2	9	0.68	2	6	1.18	-2.471	0
MgCrO3	Mg	Cr	0	2	1.36	2	6	1.18	0.439	0
MnCrO3	Mn	Cr	2	7	1.17	2	6	1.18	0.722	0
MoCrO3	Mo	Cr	2	6	1.3	2	6	1.18	-0.144	0
OsCrO3	Os	Cr	2	8	1.26	2	6	1.18	-2.734	0
PaCrO3	Pa	Cr	3	5	0.95	2	6	1.18	3.253	1
PdCrO3	Pd	Cr	0	0	1.28	2	6	1.18	0.047	0
PtCrO3	Pt	Cr	2	10	1.3	2	6	1.18	-0.677	0
RbCrO3	Rb	Cr	0	1	2.16	2	6	1.18	-0.714	0
ReCrO3	Re	Cr	2	7	1.28	2	6	1.18	-2.512	0
RhCrO3	Rh	Cr	2	9	1.25	2	6	1.18	-1.031	0
RuCrO3	Ru	Cr	2	8	1.25	2	6	1.18	-0.858	0
ScCrO3	Sc	Cr	2	3	1.44	2	6	1.18	2.781	1
SiCrO3	Si	Cr	1	4	1.11	2	6	1.18	-0.629	0
TcCrO3	Tc	Cr	2	7	1.27	2	6	1.18	-0.212	0
TeCrO3	Te	Cr	1	6	1.36	2	6	1.18	2.348	0
VCrO3	V	Cr	2	5	1.22	2	6	1.18	-0.869	0
WCrO3	W	Cr	2	6	1.3	2	6	1.18	-2.864	0
ZnCrO3	Zn	Cr	0	2	1.25	2	6	1.18	-0.105	0
ZrCrO3	Zr	Cr	2	4	1.45	2	6	1.18	2.431	0
AlMnO3	Al	Mn	1	3	1.18	2	7	1.17	-2.158	0
AsMnO3	As	Mn	1	5	1.2	2	7	1.17	-0.345	0
AuMnO3	Au	Mn	0	1	1.34	2	7	1.17	-1.162	0
BMnO3	B	Mn	1	3	0.82	2	7	1.17	-3.248	0
BeMnO3	Be	Mn	0	2	0.89	2	7	1.17	-1.718	0
CoMnO3	Co	Mn	2	9	1.16	2	7	1.17	-2.308	0
CrMnO3	Cr	Mn	2	6	1.18	2	7	1.17	-1.205	0
CuMnO3	Cu	Mn	0	1	1.17	2	7	1.17	-1.681	0
FeMnO3	Fe	Mn	2	8	1.17	2	7	1.17	-1.399	0
GaMnO3	Ga	Mn	1	3	1.26	2	7	1.17	-1.828	0
GeMnO3	Ge	Mn	1	4	1.22	2	7	1.17	0.575	0
HfMnO3	Hf	Mn	2	4	1.44	2	7	1.17	1.45	0
IrMnO3	Ir	Mn	2	9	0.68	2	7	1.17	-4.604	0
Mn2O3	Mn	Mn	2	7	1.17	2	7	1.17	0.319	0
MoMnO3	Mo	Mn	2	6	1.3	2	7	1.17	-2.055	0
NbMnO3	Nb	Mn	2	5	1.34	2	7	1.17	-1.475	0
NiMnO3	Ni	Mn	2	10	1.15	2	7	1.17	-3.746	0
PaMnO3	Pa	Mn	3	5	0.95	2	7	1.17	2.564	1
PdMnO3	Pd	Mn	0	0	1.28	2	7	1.17	-1.097	0
PtMnO3	Pt	Mn	2	10	1.3	2	7	1.17	-2.956	0
ReMnO3	Re	Mn	2	7	1.28	2	7	1.17	-4.334	0
RhMnO3	Rh	Mn	2	9	1.25	2	7	1.17	-1.999	0
RuMnO3	Ru	Mn	2	8	1.25	2	7	1.17	-1.922	0
ScMnO3	Sc	Mn	2	3	1.44	2	7	1.17	1.813	0
SiMnO3	Si	Mn	1	4	1.11	2	7	1.17	-1.849	0
SnMnO3	Sn	Mn	1	4	1.4	2	7	1.17	0.727	0
TaMnO3	Ta	Mn	2	5	1.34	2	7	1.17	-5.179	0
TcMnO3	Tc	Mn	2	7	1.27	2	7	1.17	-1.296	0
TeMnO3	Te	Mn	1	6	1.36	2	7	1.17	2.225	0
ThMnO3	Th	Mn	2	4	1.65	2	7	1.17	3.746	1
TiMnO3	Ti	Mn	2	4	1.32	2	7	1.17	-0.705	0
VMnO3	V	Mn	2	5	1.22	2	7	1.17	-1.571	0
WMnO3	W	Mn	2	6	1.3	2	7	1.17	-5.286	0
ZnMnO3	Zn	Mn	0	2	1.25	2	7	1.17	-0.703	0
ZrMnO3	Zr	Mn	2	4	1.45	2	7	1.17	1.759	0
AlFeO3	Al	Fe	1	3	1.18	2	8	1.17	-2.445	0
AsFeO3	As	Fe	1	5	1.2	2	8	1.17	-0.724	0
AuFeO3	Au	Fe	0	1	1.34	2	8	1.17	-1.534	0
BFeO3	B	Fe	1	3	0.82	2	8	1.17	-3.619	0
BaFeO3	Ba	Fe	0	2	1.98	2	8	1.17	1.185	0
BeFeO3	Be	Fe	0	2	0.89	2	8	1.17	-1.666	0
CoFeO3	Co	Fe	2	9	1.16	2	8	1.17	-0.624	0
CrFeO3	Cr	Fe	2	6	1.18	2	8	1.17	-1.245	0
CuFeO3	Cu	Fe	0	1	1.17	2	8	1.17	-1.512	0
Fe2O3	Fe	Fe	2	8	1.17	2	8	1.17	-1.446	0
GaFeO3	Ga	Fe	1	3	1.26	2	8	1.17	-2.251	0
GeFeO3	Ge	Fe	1	4	1.22	2	8	1.17	0.461	0
IrFeO3	Ir	Fe	2	9	0.68	2	8	1.17	-4.804	0
MoFeO3	Mo	Fe	2	6	1.3	2	8	1.17	-2.265	0
NaFeO3	Na	Fe	0	1	1.54	2	8	1.17	-0.436	0
NbFeO3	Nb	Fe	2	5	1.34	2	8	1.17	-0.263	0
OsFeO3	Os	Fe	2	8	1.26	2	8	1.17	-4.938	0
PdFeO3	Pd	Fe	0	0	1.28	2	8	1.17	-1.858	0
PtFeO3	Pt	Fe	2	10	1.3	2	8	1.17	-3.036	0
ReFeO3	Re	Fe	2	7	1.28	2	8	1.17	-4.592	0
RhFeO3	Rh	Fe	2	9	1.25	2	8	1.17	-2.494	0
RuFeO3	Ru	Fe	2	8	1.25	2	8	1.17	-2.602	0
ScFeO3	Sc	Fe	2	3	1.44	2	8	1.17	1.505	0
SiFeO3	Si	Fe	1	4	1.11	2	8	1.17	-1.814	0
TaFeO3	Ta	Fe	2	5	1.34	2	8	1.17	-4.452	0
TcFeO3	Tc	Fe	2	7	1.27	2	8	1.17	-1.97	0
TeFeO3	Te	Fe	1	6	1.36	2	8	1.17	-0.992	0
ThFeO3	Th	Fe	2	4	1.65	2	8	1.17	3.482	1
TiFeO3	Ti	Fe	2	4	1.32	2	8	1.17	-0.463	0
UFeO3	U	Fe	3	6	1.42	2	8	1.17	2.177	0
WFeO3	W	Fe	2	6	1.3	2	8	1.17	-2.876	0
ZnFeO3	Zn	Fe	0	2	1.25	2	8	1.17	-0.75	0
ZrFeO3	Zr	Fe	2	4	1.45	2	8	1.17	1.3	0
AlCoO3	Al	Co	1	3	1.18	2	9	1.16	-1.991	0
AsCoO3	As	Co	1	5	1.2	2	9	1.16	0.089	0
AuCoO3	Au	Co	0	1	1.34	2	9	1.16	-2.143	0
BCoO3	B	Co	1	3	0.82	2	9	1.16	-2.534	0
BeCoO3	Be	Co	0	2	0.89	2	9	1.16	-2.203	0
Co2O3	Co	Co	2	9	1.16	2	9	1.16	-2.8	0
CrCoO3	Cr	Co	2	6	1.18	2	9	1.16	-1.758	0
CuCoO3	Cu	Co	0	1	1.17	2	9	1.16	-1.005	0
FeCoO3	Fe	Co	2	8	1.17	2	9	1.16	-1.547	0
GaCoO3	Ga	Co	1	3	1.26	2	9	1.16	-11.419	0
GeCoO3	Ge	Co	1	4	1.22	2	9	1.16	0.905	0
HfCoO3	Hf	Co	2	4	1.44	2	9	1.16	0.8	0
InCoO3	In	Co	1	3	1.44	2	9	1.16	0.504	0
IrCoO3	Ir	Co	2	9	0.68	2	9	1.16	-5.721	0
MnCoO3	Mn	Co	2	7	1.17	2	9	1.16	-0.239	0
MoCoO3	Mo	Co	2	6	1.3	2	9	1.16	-0.95	0
NbCoO3	Nb	Co	2	5	1.34	2	9	1.16	0.373	0
NpCoO3	Np	Co	3	7	0.98	2	9	1.16	2.922	1
OsCoO3	Os	Co	2	8	1.26	2	9	1.16	-2.69	0
PdCoO3	Pd	Co	0	0	1.28	2	9	1.16	-0.712	0
PtCoO3	Pt	Co	2	10	1.3	2	9	1.16	-4.105	0
RbCoO3	Rb	Co	0	1	2.16	2	9	1.16	0.199	0
ReCoO3	Re	Co	2	7	1.28	2	9	1.16	-5.095	0
RhCoO3	Rh	Co	2	9	1.25	2	9	1.16	-0.711	0
RuCoO3	Ru	Co	2	8	1.25	2	9	1.16	-2.148	0
SbCoO3	Sb	Co	1	5	1.4	2	9	1.16	2.075	0
ScCoO3	Sc	Co	2	3	1.44	2	9	1.16	1.089	0
SiCoO3	Si	Co	1	4	1.11	2	9	1.16	-1.423	0
TaCoO3	Ta	Co	2	5	1.34	2	9	1.16	-0.411	0
TcCoO3	Tc	Co	2	7	1.27	2	9	1.16	-1.797	0
TeCoO3	Te	Co	1	6	1.36	2	9	1.16	1.913	0
TiCoO3	Ti	Co	2	4	1.32	2	9	1.16	0.232	0
VCoO3	V	Co	2	5	1.22	2	9	1.16	-1.853	0
WCoO3	W	Co	2	6	1.3	2	9	1.16	-2.7	0
ZnCoO3	Zn	Co	0	2	1.25	2	9	1.16	-1.336	0
ZrCoO3	Zr	Co	2	4	1.45	2	9	1.16	1.235	0
AlNiO3	Al	Ni	1	3	1.18	2	10	1.15	-3.057	0
AsNiO3	As	Ni	1	5	1.2	2	10	1.15	-0.981	0
AuNiO3	Au	Ni	0	1	1.34	2	10	1.15	-2.603	0
BNiO3	B	Ni	1	3	0.82	2	10	1.15	-5.604	0
BeNiO3	Be	Ni	0	2	0.89	2	10	1.15	-3.345	0
CoNiO3	Co	Ni	2	9	1.16	2	10	1.15	-2.152	0
CrNiO3	Cr	Ni	2	6	1.18	2	10	1.15	-3.321	0
CuNiO3	Cu	Ni	0	1	1.17	2	10	1.15	-2.679	0
FeNiO3	Fe	Ni	2	8	1.17	2	10	1.15	-2.889	0
GaNiO3	Ga	Ni	1	3	1.26	2	10	1.15	-3.142	0
GeNiO3	Ge	Ni	1	4	1.22	2	10	1.15	-2.919	0
HfNiO3	Hf	Ni	2	4	1.44	2	10	1.15	0.593	0
InNiO3	In	Ni	1	3	1.44	2	10	1.15	-1.396	0
IrNiO3	Ir	Ni	2	9	0.68	2	10	1.15	-3.797	0
KNiO3	K	Ni	0	1	2.03	2	10	1.15	-1.415	0
LiNiO3	Li	Ni	0	1	1.23	2	10	1.15	-2.014	0
MgNiO3	Mg	Ni	0	2	1.36	2	10	1.15	-1.539	0
MnNiO3	Mn	Ni	2	7	1.17	2	10	1.15	-1.57	0
MoNiO3	Mo	Ni	2	6	1.3	2	10	1.15	-3.207	0
NbNiO3	Nb	Ni	2	5	1.34	2	10	1.15	-0.477	0
OsNiO3	Os	Ni	2	8	1.26	2	10	1.15	-4.568	0
PaNiO3	Pa	Ni	3	5	0.95	2	10	1.15	1.724	0
PdNiO3	Pd	Ni	0	0	1.28	2	10	1.15	-3.072	0
PtNiO3	Pt	Ni	2	10	1.3	2	10	1.15	-4.414	0
RbNiO3	Rb	Ni	0	1	2.16	2	10	1.15	-1.599	0
ReNiO3	Re	Ni	2	7	1.28	2	10	1.15	-4.162	0
RhNiO3	Rh	Ni	2	9	1.25	2	10	1.15	-3.845	0
RuNiO3	Ru	Ni	2	8	1.25	2	10	1.15	-3.858	0
SbNiO3	Sb	Ni	1	5	1.4	2	10	1.15	0.167	0
ScNiO3	Sc	Ni	2	3	1.44	2	10	1.15	0.13	0
SiNiO3	Si	Ni	1	4	1.11	2	10	1.15	-4.359	0
SnNiO3	Sn	Ni	1	4	1.4	2	10	1.15	-2.268	0
TaNiO3	Ta	Ni	2	5	1.34	2	10	1.15	-0.846	0
TeNiO3	Te	Ni	1	6	1.36	2	10	1.15	-1.076	0
TiNiO3	Ti	Ni	2	4	1.32	2	10	1.15	-1.581	0
UNiO3	U	Ni	3	6	1.42	2	10	1.15	0.946	0
VNiO3	V	Ni	2	5	1.22	2	10	1.15	-1.428	0
WNiO3	W	Ni	2	6	1.3	2	10	1.15	-3.922	0
ZnNiO3	Zn	Ni	0	2	1.25	2	10	1.15	-1.995	0
ZrNiO3	Zr	Ni	2	4	1.45	2	10	1.15	0.886	0
AlCuO3	Al	Cu	1	3	1.18	0	1	1.17	-3.853	0
AsCuO3	As	Cu	1	5	1.2	0	1	1.17	-0.831	0
AuCuO3	Au	Cu	0	1	1.34	0	1	1.17	-3.202	0
BCuO3	B	Cu	1	3	0.82	0	1	1.17	-6.409	0
BeCuO3	Be	Cu	0	2	0.89	0	1	1.17	-4.049	0
CoCuO3	Co	Cu	2	9	1.16	0	1	1.17	-2.54	0
CrCuO3	Cr	Cu	2	6	1.18	0	1	1.17	-3.867	0
CsCuO3	Cs	Cu	0	1	2.35	0	1	1.17	-2.369	0
Cu2O3	Cu	Cu	0	1	1.17	0	1	1.17	-3.296	0
FeCuO3	Fe	Cu	2	8	1.17	0	1	1.17	-11.216	0
GaCuO3	Ga	Cu	1	3	1.26	0	1	1.17	-3.683	0
GeCuO3	Ge	Cu	1	4	1.22	0	1	1.17	-2.967	0
HfCuO3	Hf	Cu	2	4	1.44	0	1	1.17	-0.388	0
InCuO3	In	Cu	1	3	1.44	0	1	1.17	-1.222	0
IrCuO3	Ir	Cu	2	9	0.68	0	1	1.17	-6.058	0
KCuO3	K	Cu	0	1	2.03	0	1	1.17	-1.655	0
LiCuO3	Li	Cu	0	1	1.23	0	1	1.17	-2.175	0
MgCuO3	Mg	Cu	0	2	1.36	0	1	1.17	-1.789	0
MnCuO3	Mn	Cu	2	7	1.17	0	1	1.17	-1.889	0
OsCuO3	Os	Cu	2	8	1.26	0	1	1.17	-6.332	0
PdCuO3	Pd	Cu	0	0	1.28	0	1	1.17	-3.672	0
PtCuO3	Pt	Cu	2	10	1.3	0	1	1.17	-4.74	0
RbCuO3	Rb	Cu	0	1	2.16	0	1	1.17	-2.068	0
ReCuO3	Re	Cu	2	7	1.28	0	1	1.17	-6.222	0
RhCuO3	Rh	Cu	2	9	1.25	0	1	1.17	-4.112	0
RuCuO3	Ru	Cu	2	8	1.25	0	1	1.17	-4.047	0
SbCuO3	Sb	Cu	1	5	1.4	0	1	1.17	0.258	0
ScCuO3	Sc	Cu	2	3	1.44	0	1	1.17	-0.392	0
SiCuO3	Si	Cu	1	4	1.11	0	1	1.17	-5.054	0
SnCuO3	Sn	Cu	1	4	1.4	0	1	1.17	-2.239	0
TeCuO3	Te	Cu	1	6	1.36	0	1	1.17	-1.402	0
TiCuO3	Ti	Cu	2	4	1.32	0	1	1.17	-1.227	0
VCuO3	V	Cu	2	5	1.22	0	1	1.17	-3.557	0
WCuO3	W	Cu	2	6	1.3	0	1	1.17	-6.148	0
ZnCuO3	Zn	Cu	0	2	1.25	0	1	1.17	-2.402	0
ZrCuO3	Zr	Cu	2	4	1.45	0	1	1.17	-0.039	0
AgZnO3	Ag	Zn	0	1	1.34	0	2	1.25	-3.48	0
AlZnO3	Al	Zn	1	3	1.18	0	2	1.25	-5.063	0
AsZnO3	As	Zn	1	5	1.2	0	2	1.25	-2.795	0
AuZnO3	Au	Zn	0	1	1.34	0	2	1.25	-4.622	0
BZnO3	B	Zn	1	3	0.82	0	2	1.25	-7.79	0
BaZnO3	Ba	Zn	0	2	1.98	0	2	1.25	-0.437	0
BeZnO3	Be	Zn	0	2	0.89	0	2	1.25	-4.932	0
CrZnO3	Cr	Zn	2	6	1.18	0	2	1.25	-4.986	0
CsZnO3	Cs	Zn	0	1	2.35	0	2	1.25	-2.463	0
CuZnO3	Cu	Zn	0	1	1.17	0	2	1.25	-4.296	0
FeZnO3	Fe	Zn	2	8	1.17	0	2	1.25	-8.42	0
GaZnO3	Ga	Zn	1	3	1.26	0	2	1.25	-4.946	0
GeZnO3	Ge	Zn	1	4	1.22	0	2	1.25	-4.021	0
HfZnO3	Hf	Zn	2	4	1.44	0	2	1.25	-1.354	0
HgZnO3	Hg	Zn	0	2	1.49	0	2	1.25	-2.447	0
InZnO3	In	Zn	1	3	1.44	0	2	1.25	-2.864	0
IrZnO3	Ir	Zn	2	9	0.68	0	2	1.25	-8.033	0
KZnO3	K	Zn	0	1	2.03	0	2	1.25	-1.732	0
LiZnO3	Li	Zn	0	1	1.23	0	2	1.25	-4.268	0
LuZnO3	Lu	Zn	2	3	1.56	0	2	1.25	-0.648	0
MgZnO3	Mg	Zn	0	2	1.36	0	2	1.25	-2.748	0
MnZnO3	Mn	Zn	2	7	1.17	0	2	1.25	-2.793	0
MoZnO3	Mo	Zn	2	6	1.3	0	2	1.25	-5.452	0
NaZnO3	Na	Zn	0	1	1.54	0	2	1.25	-1.851	0
NbZnO3	Nb	Zn	2	5	1.34	0	2	1.25	-4.159	0
NpZnO3	Np	Zn	3	7	0.98	0	2	1.25	0.507	0
OsZnO3	Os	Zn	2	8	1.26	0	2	1.25	-7.755	0
PaZnO3	Pa	Zn	3	5	0.95	0	2	1.25	0.884	0
PdZnO3	Pd	Zn	0	0	1.28	0	2	1.25	-5.331	0
PtZnO3	Pt	Zn	2	10	1.3	0	2	1.25	-6.585	0
PuZnO3	Pu	Zn	3	8	0.96	0	2	1.25	-0.405	0
RbZnO3	Rb	Zn	0	1	2.16	0	2	1.25	-1.991	0
ReZnO3	Re	Zn	2	7	1.28	0	2	1.25	-7.451	0
RhZnO3	Rh	Zn	2	9	1.25	0	2	1.25	-5.935	0
RuZnO3	Ru	Zn	2	8	1.25	0	2	1.25	-5.64	0
SbZnO3	Sb	Zn	1	5	1.4	0	2	1.25	-1.53	0
ScZnO3	Sc	Zn	2	3	1.44	0	2	1.25	-1.353	0
SiZnO3	Si	Zn	1	4	1.11	0	2	1.25	-6.175	0
SnZnO3	Sn	Zn	1	4	1.4	0	2	1.25	-3.811	0
TaZnO3	Ta	Zn	2	5	1.34	0	2	1.25	-5.628	0
TcZnO3	Tc	Zn	2	7	1.27	0	2	1.25	-5.568	0
TeZnO3	Te	Zn	1	6	1.36	0	2	1.25	-3.099	0
ThZnO3	Th	Zn	2	4	1.65	0	2	1.25	3.275	1
TiZnO3	Ti	Zn	2	4	1.32	0	2	1.25	-3.817	0
TlZnO3	Tl	Zn	1	1	1.48	0	2	1.25	-2.814	0
UZnO3	U	Zn	3	6	1.42	0	2	1.25	1.141	0
VZnO3	V	Zn	2	5	1.22	0	2	1.25	-4.832	0
WZnO3	W	Zn	2	6	1.3	0	2	1.25	-6.731	0
Zn2O3	Zn	Zn	0	2	1.25	0	2	1.25	-3.345	0
ZrZnO3	Zr	Zn	2	4	1.45	0	2	1.25	-0.762	0
AlGaO3	Al	Ga	1	3	1.18	1	3	1.26	-3.306	0
AsGaO3	As	Ga	1	5	1.2	1	3	1.26	-0.391	0
AuGaO3	Au	Ga	0	1	1.34	1	3	1.26	-2.697	0
BGaO3	B	Ga	1	3	0.82	1	3	1.26	-6.3	0
BaGaO3	Ba	Ga	0	2	1.98	1	3	1.26	0.071	0
BeGaO3	Be	Ga	0	2	0.89	1	3	1.26	-3.77	0
CrGaO3	Cr	Ga	2	6	1.18	1	3	1.26	-2.49	0
CsGaO3	Cs	Ga	0	1	2.35	1	3	1.26	-2.267	0
CuGaO3	Cu	Ga	0	1	1.17	1	3	1.26	-3.441	0
FeGaO3	Fe	Ga	2	8	1.17	1	3	1.26	-3.176	0
Ga2O3	Ga	Ga	1	3	1.26	1	3	1.26	-3.944	0
GeGaO3	Ge	Ga	1	4	1.22	1	3	1.26	-1.29	0
HfGaO3	Hf	Ga	2	4	1.44	1	3	1.26	2.16	0
InGaO3	In	Ga	1	3	1.44	1	3	1.26	-1.252	0
IrGaO3	Ir	Ga	2	9	0.68	1	3	1.26	-4.314	0
KGaO3	K	Ga	0	1	2.03	1	3	1.26	-1.802	0
LiGaO3	Li	Ga	0	1	1.23	1	3	1.26	-2.557	0
MgGaO3	Mg	Ga	0	2	1.36	1	3	1.26	-2.133	0
MnGaO3	Mn	Ga	2	7	1.17	1	3	1.26	-1.675	0
MoGaO3	Mo	Ga	2	6	1.3	1	3	1.26	-1.156	0
NiGaO3	Ni	Ga	2	10	1.15	1	3	1.26	-5.002	0
OsGaO3	Os	Ga	2	8	1.26	1	3	1.26	-4.119	0
PdGaO3	Pd	Ga	0	0	1.28	1	3	1.26	-3.072	0
PtGaO3	Pt	Ga	2	10	1.3	1	3	1.26	-3.192	0
ReGaO3	Re	Ga	2	7	1.28	1	3	1.26	-3.09	0
RhGaO3	Rh	Ga	2	9	1.25	1	3	1.26	-2.905	0
RuGaO3	Ru	Ga	2	8	1.25	1	3	1.26	-2.497	0
ScGaO3	Sc	Ga	2	3	1.44	1	3	1.26	3.32	1
SiGaO3	Si	Ga	1	4	1.11	1	3	1.26	-2.393	0
SnGaO3	Sn	Ga	1	4	1.4	1	3	1.26	0.236	0
SrGaO3	Sr	Ga	0	2	1.91	1	3	1.26	-0.172	0
TcGaO3	Tc	Ga	2	7	1.27	1	3	1.26	-1.578	0
TeGaO3	Te	Ga	1	6	1.36	1	3	1.26	0.277	0
ThGaO3	Th	Ga	2	4	1.65	1	3	1.26	3.842	1
TiGaO3	Ti	Ga	2	4	1.32	1	3	1.26	0.279	0
VGaO3	V	Ga	2	5	1.22	1	3	1.26	-2.324	0
ZnGaO3	Zn	Ga	0	2	1.25	1	3	1.26	-2.607	0
ZrGaO3	Zr	Ga	2	4	1.45	1	3	1.26	2.65	1
AlGeO3	Al	Ge	1	3	1.18	1	4	1.22	0.597	0
AsGeO3	As	Ge	1	5	1.2	1	4	1.22	1.493	0
AuGeO3	Au	Ge	0	1	1.34	1	4	1.22	-0.023	0
BGeO3	B	Ge	1	3	0.82	1	4	1.22	-0.598	0
BeGeO3	Be	Ge	0	2	0.89	1	4	1.22	1.025	0
CoGeO3	Co	Ge	2	9	1.16	1	4	1.22	1.515	0
CrGeO3	Cr	Ge	2	6	1.18	1	4	1.22	1.771	0
CuGeO3	Cu	Ge	0	1	1.17	1	4	1.22	-0.446	0
DyGeO3	Dy	Ge	3	2	1.6	1	4	1.22	2.802	1
ErGeO3	Er	Ge	3	14	1.58	1	4	1.22	2.685	1
GaGeO3	Ga	Ge	1	3	1.26	1	4	1.22	1.949	0
GdGeO3	Gd	Ge	3	10	1.62	1	4	1.22	2.902	1
HfGeO3	Hf	Ge	2	4	1.44	1	4	1.22	0.65	0
HoGeO3	Ho	Ge	3	13	1.58	1	4	1.22	2.734	1
IrGeO3	Ir	Ge	2	9	0.68	1	4	1.22	-1.212	0
LuGeO3	Lu	Ge	2	3	1.56	1	4	1.22	2.514	1
MgGeO3	Mg	Ge	0	2	1.36	1	4	1.22	3.024	1
MoGeO3	Mo	Ge	2	6	1.3	1	4	1.22	1.353	0
NaGeO3	Na	Ge	0	1	1.54	1	4	1.22	-0.339	0
NbGeO3	Nb	Ge	2	5	1.34	1	4	1.22	1.286	0
OsGeO3	Os	Ge	2	8	1.26	1	4	1.22	0.78	0
PdGeO3	Pd	Ge	0	0	1.28	1	4	1.22	0.441	0
PtGeO3	Pt	Ge	2	10	1.3	1	4	1.22	0.429	0
ReGeO3	Re	Ge	2	7	1.28	1	4	1.22	0.643	0
RhGeO3	Rh	Ge	2	9	1.25	1	4	1.22	1.023	0
RuGeO3	Ru	Ge	2	8	1.25	1	4	1.22	0.465	0
SbGeO3	Sb	Ge	1	5	1.4	1	4	1.22	3.445	1
ScGeO3	Sc	Ge	2	3	1.44	1	4	1.22	2.523	1
SiGeO3	Si	Ge	1	4	1.11	1	4	1.22	3.399	1
SrGeO3	Sr	Ge	0	2	1.91	1	4	1.22	4.097	1
TaGeO3	Ta	Ge	2	5	1.34	1	4	1.22	0.27	0
TbGeO3	Tb	Ge	3	11	1.61	1	4	1.22	2.859	1
TcGeO3	Tc	Ge	2	7	1.27	1	4	1.22	2.263	0
TeGeO3	Te	Ge	1	6	1.36	1	4	1.22	1.866	0
ThGeO3	Th	Ge	2	4	1.65	1	4	1.22	1.598	0
TiGeO3	Ti	Ge	2	4	1.32	1	4	1.22	2.162	0
TmGeO3	Tm	Ge	3	15	1.58	1	4	1.22	2.604	1
UGeO3	U	Ge	3	6	1.42	1	4	1.22	2.243	0
VGeO3	V	Ge	2	5	1.22	1	4	1.22	2.025	0
WGeO3	W	Ge	2	6	1.3	1	4	1.22	0.254	0
YGeO3	Y	Ge	2	3	1.62	1	4	1.22	2.86	1
ZnGeO3	Zn	Ge	0	2	1.25	1	4	1.22	1.669	0
ZrGeO3	Zr	Ge	2	4	1.45	1	4	1.22	1.155	0

## Sheet: 20 doped perovskites
Chemical formula	Lv (A)	Nv (A)	AR (A)	Lv (B)	Nv (B)	AR (B)
La0.5Sr0.5MnO3	2	2.5	1.8	2	7	1.17
La0.5Ca0.5MnO3	2	2.5	1.715	2	7	1.17
La0.7Sr0.3Mn0.9Cr0.1O3	2	2.7	1.756	2	6.9	1.171
La0.7Sr0.3Mn0.8Cr0.2O3	2	2.7	1.756	2	6.8	1.172
LaGa0.4Co0.6O3	2	3	1.69	2	6.6	1.2
LaGa0.5Co0.5O3	2	3	1.69	2	6	1.21
La0.6Sr0.4CoO3	2	2.6	1.778	2	9	1.16
La0.6Sr0.4Cr0.8Co0.2O3	2	2.6	1.778	2	6.6	1.176
Y0.5Sr0.5MnO3	2	2.5	1.765	2	7	1.17
Y0.5Ca0.5MnO3	2	2.5	1.68	2	7	1.17
La0.6Sr0.4Mn0.4Al0.6O3	2	2.6	1.778	2	4.6	1.176
La0.5Sr0.5Mn0.95Sc0.05O3	2	2.5	1.8	2	6.8	1.1835
La0.6Sr0.4Mn0.6Fe0.4O3	2	2.6	1.778	2	7.4	1.17
La0.6Sr0.4Mn0.4Fe0.6O3	2	2.6	1.778	2	7.6	1.17
La0.6Sr0.4FeO3	2	2.6	1.778	2	8	1.17
La0.6Ca0.4Mn0.6Al0.4O3	2	2.6	1.71	2	5.4	1.174
LaFe0.8Co0.2O3	2	3	1.69	2	8.2	1.168
La0.6Ca0.4Mn0.8Ga0.2O3	2	2.6	1.71	2	6.2	1.188
La0.6Ca0.4CoO3	2	2.6	1.71	2	9	1.16
La0.6Sr0.4Co0.8Fe0.2O3	2	2.6	1.778	2	8.8	1.168
